# Supplementary material
Source: PubMed Central journal article supplement (PMC3266722)
Supplement: NIHMS343038-supplement-1.pdf [file NIHMS343038-supplement-1.pdf]

## Supporting Information

### Structure-Activity Relationships of Truncated C2- or C8-Substituted Adenosine Derivatives as Dual Acting A<sub>2A</sub> and A<sub>3</sub> Adenosine Receptor Ligands

Xiyan Hou,<sup>1</sup> Mahesh S. Majik,<sup>1</sup> Kyunglim Kim,<sup>1</sup> Yuna Pyee,<sup>2</sup> Yoonji Lee,<sup>1</sup> Varughese Alexander,<sup>1</sup> Hwa-Jin Chung,<sup>2</sup> Hyuk Woo Lee,<sup>1</sup> Girish Chandra,<sup>1</sup> Jin Hee Lee,<sup>1</sup> Seul-gi Park,<sup>1</sup> Won Jun Choi,<sup>1,3</sup> Hea Ok Kim,<sup>1</sup> Khai Phan,<sup>4</sup> Zhan-Guo Gao,<sup>4</sup> Kenneth A. Jacobson,<sup>4</sup> Sun Choi<sup>1</sup> Sang Kook Lee,<sup>2</sup> and Lak Shin Jeong<sup>1,\*</sup>

<sup>1</sup>Laboratory of Medicinal Chemistry, College of Pharmacy and Department of Bioinspired Science, Ewha Womans University, Seoul 120-750, Korea, <sup>2</sup>College of Pharmacy, Seoul National University, Seoul 151-742, Korea, <sup>3</sup>College of Pharmacy, Dongguk University, Kyungki-do 410-774, Korea, and <sup>4</sup>Molecular Recognition Section, Laboratory of Bioorganic Chemistry, National Institute of Diabetes, and Digestive and Kidney Disease, National Institutes of Health, Bethesda, Maryland 20892, USA

e-mail: lakjeong@ewha.ac.kr

## Contents

|                         |           |
|-------------------------|-----------|
| <b>Scheme 1S.</b> ..... | <b>S2</b> |
|-------------------------|-----------|

**Scheme 1S.** Mechanism for lithiation mediated stannyl transfer of 6-chloropurine nucleoside

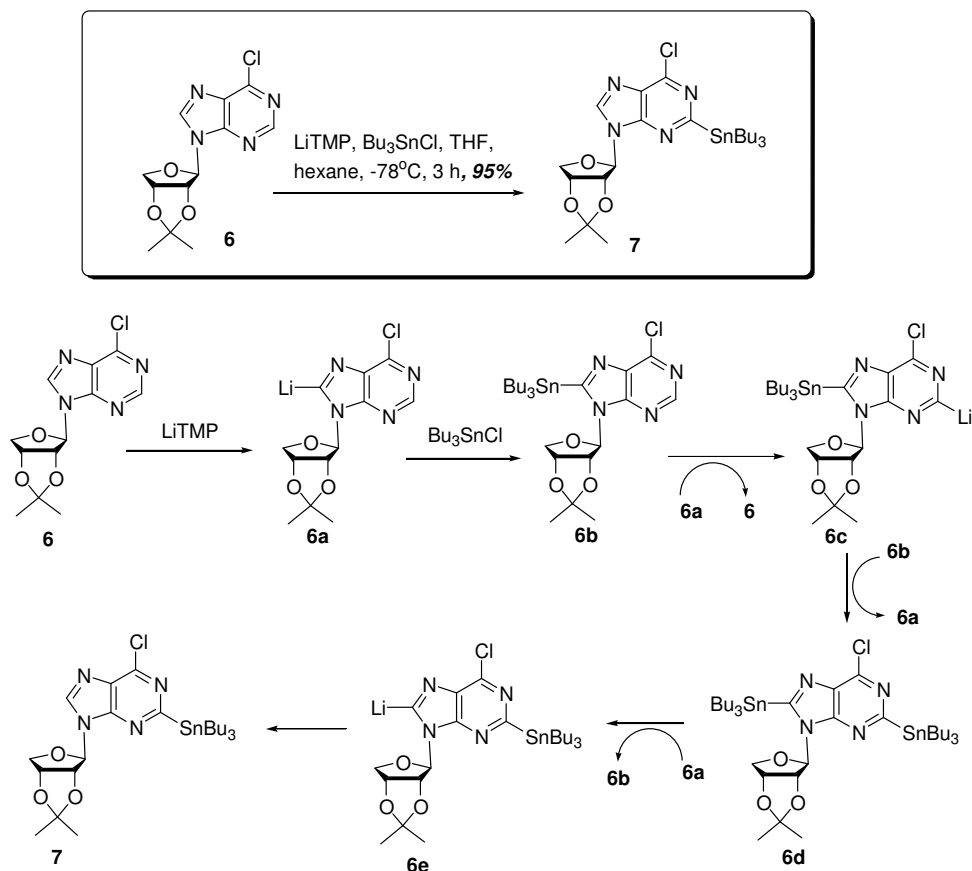

The possible reaction mechanism is depicted in Scheme 1S which can be summarized as follows: The initial lithiation (LiTMP) occurs at the C8-position of purine moiety to give **6a** which was trapped with Bu<sub>3</sub>SnCl to give C8-stannylated derivative **6b**. Further, the **6b** undergoes lithiation at the C2-position with **6a** (or with lithiating agent) to give **6c**. The reaction between **6c** and **6b** (C8-stannylated derivative) gave the 2,8-bis stannylated compound **6d** and the regeneration of **6a** simultaneously. Finally, stannyl transfer from **6d** (2,8-bis stannylated derivative) to **6a** furnish **6e** which is stable under the lithiation condition and thus get accumulated in the reaction mixture to give **7** as a sole product in regioselective manner. (Kato, K.; Hayakawa, H.; Tanaka, H.; Kumamoto, H.; Shindoh, S.; Shuto, S.; Miyasaka, T. *J. Org. Chem.* **1997**, *62*, 6833–6841).
